# Supplementary material
Source: publisher figshare collection journal article supplement (https://karger.figshare.com/ndownloader/files/13310219)
Supplement: Supplementary file 1 [file 13310219]

**Supplementary Figures**

**Figure 1.** Group differences of FC between the aMCI and control groups

(A) Function connectivity from left putamen

(B) Function connectivity from left inferior temporal gyrus

zFC, functional connectivity (r-to-z transformation)
